# Supplementary material
Source: PubMed Central journal article supplement (PMC2662245)
Supplement: M804053200_1.pdf [file M804053200_1.pdf]

| Mutation    | Primer                                                                                                                         |
|-------------|--------------------------------------------------------------------------------------------------------------------------------|
| E198A       | F-ggc ccc tgg cac gcc cat aac ggc gac<br>R-gtc gcc gtt atg ggc gtg cca ggg gcg                                                 |
| E315A       | F-gcc gcc ctg acc gcc acg ggc aat aat<br>R-att att gcc ctg ggc ggt gac ggc ggc                                                 |
| L106G       | F-g gga cac acc gcc aat gga gat gcg gtt aac ttt g<br>R-c aaa gtt aac cgc atc tcc att ggc ggt gtg tcc c                         |
| L106A       | F-g gga cac acc gcc aat gct gat gcg gtt aac ttt g<br>R-c aaa gtt aac cgc atc agc att ggc ggt gtg tcc c                         |
| D107G       | F-g gga cac acc gcc aat ctg gga gcg gtt aac ttt gaa aag<br>R-ctt ttc aaa gtt aac cgc tcc cag att ggc ggt gtg tcc c             |
| D107A       | F-g gga cac acc gcc aat ctg gct gcg gtt aac ttt gaa aag<br>R-ctt ttc aaa gtt aac cgc agc cag att ggc ggt gtg tcc c             |
| L106G/D107G | F-gaa ttg gga cac acc gcc aat gga gga gcg gtt aac ttt gaa aag<br>R-ctt ttc aaa gtt aac cgc tcc tcc att ggc ggt gtg cct aac ttc |
| L106A/D107A | F-gaa ttg gga cac acc gcc aat gca gca gcg gtt aac ttt gaa aag<br>R-ctt ttc aaa gtt aac cgc tgc tgc att ggc ggt gtg cct aac ttc |
| ΔLD         | F-gcg gtt aac ttt gaa aag atg cag ca<br>R-aat ggc ggt gtg tcc caa ttc cag g                                                    |
| ΔNLD        | F-gcg gtt aac ttt gaa aag atg cag ca<br>R- ggc ggt gtg tcc caa ttc cag gcc                                                     |
| ΔNLDA       | F- gtt aac ttt gaa aag atg cag cac tg<br>R- ggc ggt gtg tcc caa ttc cag gcc                                                    |
